# Supplementary material for: Volcano Tsunamis and their effects on moored vessels safety: The 2022 Tonga event
Source: Copernicus journal article supplement (doi:10.5194/egusphere-2024-663), 2024-03-07
Supplement: Supplementary file [file egusphere-2024-663-RC2-supplement.pdf]

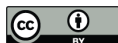

1 **Volcano Tsunamis and their effects on moored vessels**  
2 **safety: The 2022 Tonga event**

3 Sergio Padilla<sup>1</sup>, Íñigo Aniel-Quiroga<sup>1</sup>, Rachid Omira<sup>2,4</sup>, Mauricio González<sup>1</sup>, Jihwan  
4 Kim<sup>2</sup>, Maria A. Baptista<sup>3,4</sup>

5 <sup>1</sup> Environmental Hydraulics Institute, Universidad de Cantabria (IHCANTABRIA), Avda. Isabel Torres,  
6 15, Santander, Spain

7 <sup>2</sup> Instituto Português do Mar e da Atmosfera (IPMA), Lisbon, Portugal

8 <sup>3</sup> Instituto Superior de Engenharia de Lisboa; Lisbon, Portugal

9 <sup>4</sup> Instituto Dom Luiz, Faculdade de Ciências da Universidade de Lisboa

10 *Correspondence to:* Sergio Padilla (sergio.padilla@unican.es)

11 **Abstract.** The violent explosion of the Hunga Tonga-Hunga Ha'apai volcano on January 15, 2022, was the  
12 origin of an atmospheric wave and a volcano-meteorological tsunami (VMT), both of which were recorded  
13 worldwide. The Tonga tsunami event caused resonance effects, leading to wave amplification in some far-  
14 field coastal areas like La Pampilla port in Callao, Peru, 10,000 km away from the volcano, where the  
15 rupture of the **vessel mooring lines** occurred 15 hours after the eruption, resulting the spill of over 11,000  
16 barrels of crude oil. This study aims to better understand the coastal effects of the Tonga tsunami, focusing  
17 on mooring loads in marine port environments. We examine how the VMT affected the safety of vessel  
18 moorings, hypothesising that atmosphere-induced acoustic ocean waves exerted hydrodynamic loading that  
19 endangered ships in port areas. A tsunami propagation obtained with a validated Boussinesq model at the  
20 local scale in Callao Bay provides the input to the mooring system model applied to a vessel with similar  
21 characteristics to the one docked at La Pampilla Port on the day of the Tonga event. This allows to study  
22 the effect of the VMT on overstressing and the potential mooring breakage. The results suggest that the  
23 Tonga tsunami event could be responsible for the movement and loss of positioning of the vessel.  
24 Furthermore, atmospheric waves significantly increased mooring stresses, particularly on the starboard  
25 quarter moorings. This event showed the need to prepare Tsunami Early Warning Systems and port  
26 authorities for detecting and managing VMTs induced by atmospheric acoustic waves. The work provides  
27 new insights into the far-field effects of the Tonga 2022 tsunami and discusses the **lessons learned** from  
28 such an uncommon event.

29 **1. Introduction**

30 Volcanic activity can trigger tsunamis through underwater explosion, caldera collapse, pyroclastic flow,  
31 flank collapse, or atmospheric gravity waves produced by large explosions (Paris, 2015). Throughout  
32 history, tsunamis of volcanic origin have been poorly studied due to their scarcity, leading to a limited  
33 understanding of their generation mechanisms and impacts at local, regional, and global scales (Hayward  
34 et al., 2022). To better understand this type of tsunami geneses and, therefore, reduce the epistemic

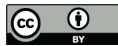

35 uncertainties associated with it, several studies have been carried out (Antonopoulos, 1992; Pararas-  
36 Carayannis, 1992, 2004), which also include aquatic environments other than oceans, such as great lakes  
37 in Russia and The Philippines (Belousov et al., 2000; Falvard et al., 2018). In these studies, the 1883  
38 eruption of the Krakatau volcano in the Sunda Strait (Indonesia), is commonly accepted as a main reference  
39 and a unique example (Kienle et al., 1987), as it was the first event of its kind recorded by different  
40 instruments worldwide (Paris et al., 2014; Yokoyama, 1981).

41 The Hunga Tonga-Hunga Ha'apai volcano (HTHH) is a submarine volcano near an island with the same  
42 name, and located 65 km NNW of the island of Tongatapu capital of Tonga, Nuku'alofa (20.55°S,  
43 175.39°W, see location in Figure 1). It is one of several active volcanoes in the Kingdom of Tonga, an  
44 archipelago nation in the South Pacific. The latest eruptive phase of the HTHH volcano began in mid-  
45 December 2021 with vigorous shallow-water explosive activity. On January 15, 2022, the volcano erupted  
46 at 4:00 a.m. UTC (Tonga Volcanic Eruption & Tsunami, 2022). Tonga experienced a volcano-  
47 meteorological tsunami (VMT) following a violent volcanic explosion that generated atmospheric gravity  
48 waves that propagated several times across the globe (Omira et al., 2022; Wright et al., 2022). These waves  
49 resulted from particle agitation in the atmosphere, travelling both vertically and horizontally at sonic and  
50 supersonic speeds (Kubota et al., 2022; Matoza et al., 2022; Wright et al., 2022; Dogan et al., 2023). Reports  
51 of ocean-free surface elevations greater than 1 m, causing damage to ports and infrastructure, emerged after  
52 the volcano explosion, originating from coastal areas near Tonga to the northwest and southeast Pacific  
53 (Ramírez-Herrera et al., 2022; Imamura et al., 2022). The affected locations include Australia, New  
54 Zealand, the United States, Mexico, and Peru, resulting in economic losses of approximately \$102 million  
55 due to damages to floating docks, vessels, and infrastructure (Terry et al., 2022; World Bank, 2024).

56 The Tonga VMT was exceptional as it travelled at faster speeds than common tsunamis, had a global reach,  
57 affected the far-field coasts, and caused noticeable damages, human fatalities, and coastal hydrodynamic  
58 effects (Terry et al., 2022; Omira et al., 2022; Lynett et al., 2022). In their study, Omira et al. (2022)  
59 demonstrated that the primary source of the globally observed Tonga tsunami was the acoustic gravity  
60 waves radiated from the volcanic explosion. Here, the sizeable tsunami at some distant coasts (i.e., South  
61 America and Japan) was associated with the amplified ocean waves under Proudman resonance (Proudman,  
62 1929) when the atmospheric wave propagated over very deep water (i.e., oceanic trenches). Other triggering  
63 mechanisms, including the submarine volcanic explosion, likely contributed to the generation of the locally  
64 observed tsunami in the far-field (Lynett et al., 2022; Omira et al., 2022).

65 The consequences of harbour-intruding long waves on moored vessels have been investigated by numerous  
66 studies (Ayca and Lynett, 2016, 2018, 2021; Kirby et al., 2022; Wilson et al., 2017). Seismic tsunamis often  
67 cause damage to port environments, such as broken moorings, collisions, or subsidence due to the large  
68 amount of momentum flux travelling within the harbour (Lynett et al., 2022; Ohgaki et al., 2008; Inoue et  
69 al., 2001). This also applies to tsunamis induced by atmospheric disturbances, which, like the previous ones,  
70 have caused damage to ships, moored vessels, and small bays (Imamura et al., 2022; Thomson et al., 2009).  
71 It has been observed in these studies that strong currents, often accompanying long-period waves, increase  
72 the probability of generating large catastrophes in harbours (Shigeeki and Masayoshi, 2009; Sakakibara et

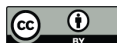

73 al., 2010; Zheng et al., 2022; Lynett et al., 2012). Likewise, based on DOFs (Degrees Of Freedom), some  
74 authors such as López and Iglesias (2014) agree with the hypothesis that the motions in the vessel's  
75 horizontal plane (named roll, heave, and yaw) are strongly correlated with the total tsunami wave energy,  
76 with the currents being quite significant in ship sway response (Inoue et al., 2001). Furthermore, Ohgaki et  
77 al. (2008) and Zheng et al. (2022) mention that tsunamis are usually closer to the natural period of a mooring  
78 system (>80 sec), which makes these waves more prone to generate damage. Given the non-linearity of  
79 physical processes, it is pertinent to perform specific studies focused on each situation, configuration, and  
80 need (Zheng et al., 2022).

81 In La Pampilla Port in Peru, 10,000 km away from the Tonga volcano, the Italian-flagged oil tanker Mare  
82 Doricum reported the breakage of their mooring lines, 15 hours after the explosion of the HTHH volcano.  
83 The ship captain associated the breaking of the vessel's moorings with the abnormal waves in the sea, for  
84 which no warning was issued (SPDA Actualidad Ambiental, 2024). The Peruvian National Tsunami  
85 Warning System (CNAT) stated that the Tonga tsunami did not generate a tsunami on the Peruvian coast  
86 (CNAT, 2022). However, the tide gauge located in Callao Bay recorded a sudden change in sea level  
87 coincident with the time of the accident (Sea level station monitoring facility, 2022). This article addresses  
88 the impact of the Tonga 2022 tsunami on vessels moored on the Peruvian coast. It uses both sea-level data  
89 analysis and numerical modelling to improve the understanding of the damage caused by far-field Tonga  
90 VMT, studying its influence on the safety of moored vessels.

## 91 2. Data and Methods

92 Considering the complexity of the Tonga tsunami event, which likely involved multiple triggering volcanic  
93 mechanisms, analysing waves measured by both oceanic and atmospheric instruments is highly important  
94 (Wright et al., 2022). Firstly, we used the wavelet analysis to examine the composition of the signals  
95 recorded by both tidal gauges and DART buoys. Secondly, we studied the hydrodynamic effects of the  
96 Tonga tsunami in the far field, using tsunami numerical simulations (Boussinesq-type model) over high-  
97 resolution bathymetric models. Thirdly, we developed an analytical model to assess the stresses due to  
98 hydrodynamic loads on moored vessels.

### 99 2.1. Air pressure and sea level data

100 The data used in this study includes records from DART buoys, tide gauges, and weather stations in the  
101 Pacific Ocean. Figure 1 shows the location of the instruments considered in this study, with red circles  
102 representing the atmospheric pressure sensors, light blue triangles for the tide gauges, and yellow dots for  
103 the DART buoys.

104 The deep-water sea level time series (D1, D2, and D3) were obtained from the DART buoys, which in turn  
105 managed by the Center for Operational Oceanographic Products and Services of the National Oceanic and  
106 Atmospheric Administration (NOAA, <https://www.ndbc.noaa.gov/>). Coastal sea level data used in this  
107 study come from tidal stations connected in real-time to the Sea Level Station Monitoring Facility of  
108 UNESCO's Intergovernmental Oceanographic Commission (IOC, <http://www.ioc->



109 [sealevelmonitoring.org/](https://sealevelmonitoring.org/)). The **B1** air pressure data have been obtained from local agents in New Zealand  
 110 (NIWA, <https://niwa.co.nz/>) and those from stations **B3**, **B4**, **B5**, and **B8** came from the Dirección General  
 111 De Aeronáutica Civil de Chile (DGAC, <https://climatologia.meteochile.gob.cl/>) through the Chilean  
 112 Meteorological Office.

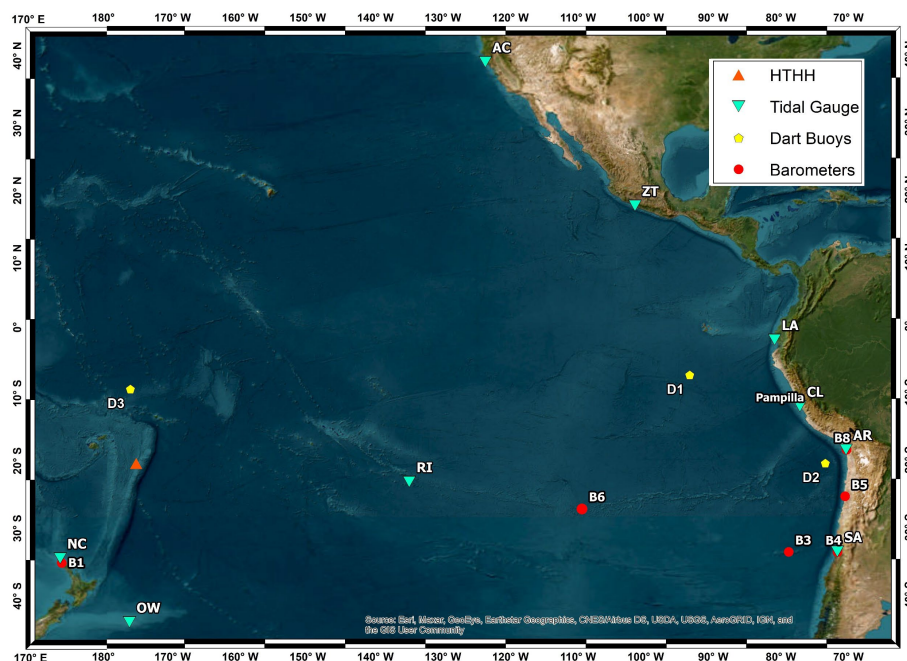

113  
 114 **Figure 1. Locations of the measuring instruments. Red circles show the atmospheric pressure sensors, the light blue triangles show the tide gauges, and the yellow circles refer to the Dart Buoys. The location of the Tonga volcano (HTTH) is the orange triangle.**  
 115  
 116

117 The sea level time series were de-tided using bandpass filters of 1.5 min-2.5 hours and 2 min - 3 hours for  
 118 DART and tide gauge data, respectively, following Lynett et al. (2022). For atmospheric pressure data, a  
 119 bandpass filter of 1.5 min - 2.5 hours was used (Table 1). Figure 2 shows the filtered time-series. **The air-**  
 120 **pressure time-series shows a notable peak of approximately 2 hPa with the "N-wave" pulse shape associated**  
 121 **with the leading Lamb wave (Lynett et al., 2022; Omira et al., 2022).**

| Type       | ID | Name         | Source (country) | Latitude (deg) | Longitude (deg) | Distance from source (km) | Sample (min) |
|------------|----|--------------|------------------|----------------|-----------------|---------------------------|--------------|
| Barometric | B1 | Nort Cape B. | New Zealand Gov  | -35.134        | 173.263         | 1750                      | 10           |
|            | B3 | 330031       | Chilelan Gov.    | -33.636        | -78.833         | 9110                      | 1            |
|            | B4 | 330030       | Chilelan Gov.    | -33.656        | -71.613         | 9720                      | 1            |
|            | B5 | 250005       | Chilelan Gov.    | -25.411        | -70.484         | 10230                     | 1            |
|            | B6 | 270001       | Chilelan Gov     | -35.134        | 173.263         | 6530                      | 1            |
|            | B8 | 180042       | Chilelan Gov.    | -18.513        | -70.266         | 10600                     | 1            |

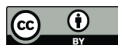

|            |    |                 |                   |         |          |       |    |
|------------|----|-----------------|-------------------|---------|----------|-------|----|
| Tide Gauge | NC | North Cape T.G. | IOC (New Zealand) | -34.410 | 173.050  | 1715  | 1  |
|            | RI | Rikitea         | IOC (France)      | -23.118 | -134.969 | 4025  | 1  |
|            | AC | Arena Cove      | IOC (USA)         | 38.913  | -123.705 | 8700  | 1  |
|            | ZT | Zihuatanejo     | IOC (Mexico)      | 17.637  | -101.558 | 9155  | 1  |
|            | GL | Galapagos       | IOC (Ecuador)     | -0.752  | -90.307  | 9410  | 1  |
|            | SA | San Antonio     | IOC (Chile)       | -33.582 | -71.618  | 9720  | 1  |
|            | OW | Owenga          | IOC (New Zealand) | -44.025 | -176.369 | 2290  | 1  |
|            | AR | Arica           | IOC (Chile)       | -18.476 | -70.323  | 10595 | 1  |
|            | CL | Callao          | IOC (Perú)        | -12.069 | -77.167  | 10240 | 1  |
|            | LA | La Libertad     | IOC (Ecuador)     | 13.485  | -89.319  | 10305 | 1  |
| DART       | D1 | 32413           | NDBC (USA)        | -7.421  | -93.484  | 8800  | 15 |
|            | D2 | 32401           | NDBC (USA)        | -20.474 | -73.421  | 10205 | 15 |
|            | D3 | 51425           | NDBC (USA)        | -9.511  | -176.258 | 1530  | 15 |

122 Table 1. Description of measuring instruments.

123

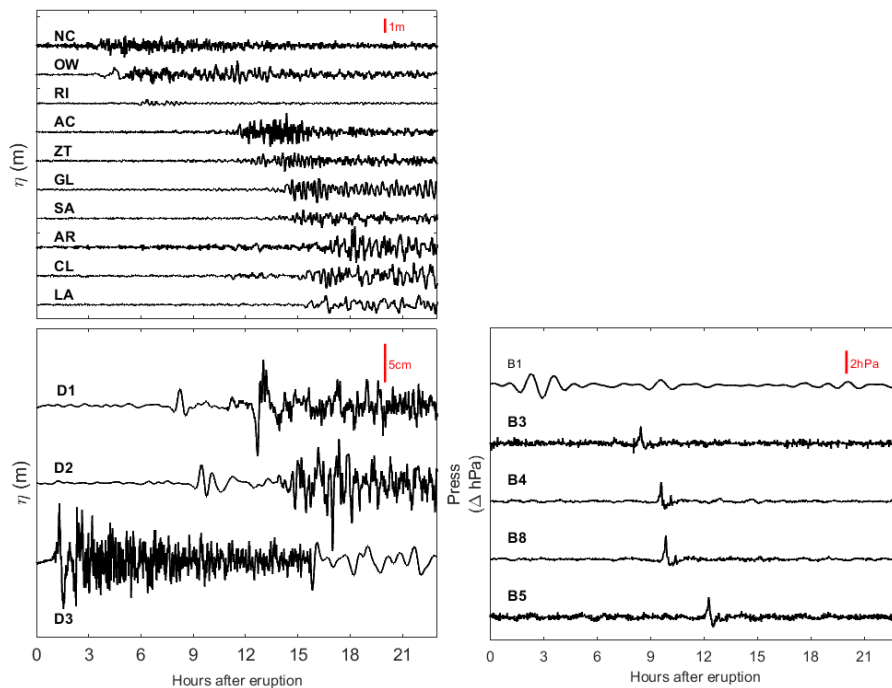

124

125 Figure 2. De-tided time series. Air pressure data (right panel), tide gauge, and Dart data (left panel). Vertical  
126 red lines used to scale the magnitude of the variations in each instrument.



127 **2.2. Spectral analysis**

128 Spectral analysis is a practical tool for identifying the characteristic frequencies and energy levels in a time-  
129 series, particularly when it is composed of the superposition of signals with different frequencies. This  
130 method has found extensive application in the study of tsunamis (Abe, 2011; Rabinovich, 1997;  
131 Shevchenko et al., 2011; Satake et al., 2013; Baptista et al., 2016; Xu et al., 2022). In the time domain, we  
132 use wavelets to perform spectral analysis, allowing the estimation of the evolution of the spectral energy  
133 and, consequently, the first instants of energy increase for a given specific period.

134 **2.3. Tsunami propagation model**

135 Although air-ocean interaction has been recognized as a primary mechanism for the global fast-travelling  
136 Tonga 2022 tsunami (Omira et al., 2022), volcano-ocean interaction provided valid explanations for the  
137 near-field observation (Lynett et al., 2022; Pakoksung et al., 2022). As our primary target is Callao Bay,  
138 located approximately 10,000 km away from the HTHH volcano (Figure 3), we only focused on the tsunami  
139 induced by the atmospheric disturbances that followed the volcano explosion. The hypothesis of a point-  
140 source tsunami reaching the South American coast was ruled out considering the modelling results of a  
141 tsunami generated by the underwater explosion of the HTHH volcano (Omira et al., 2022).

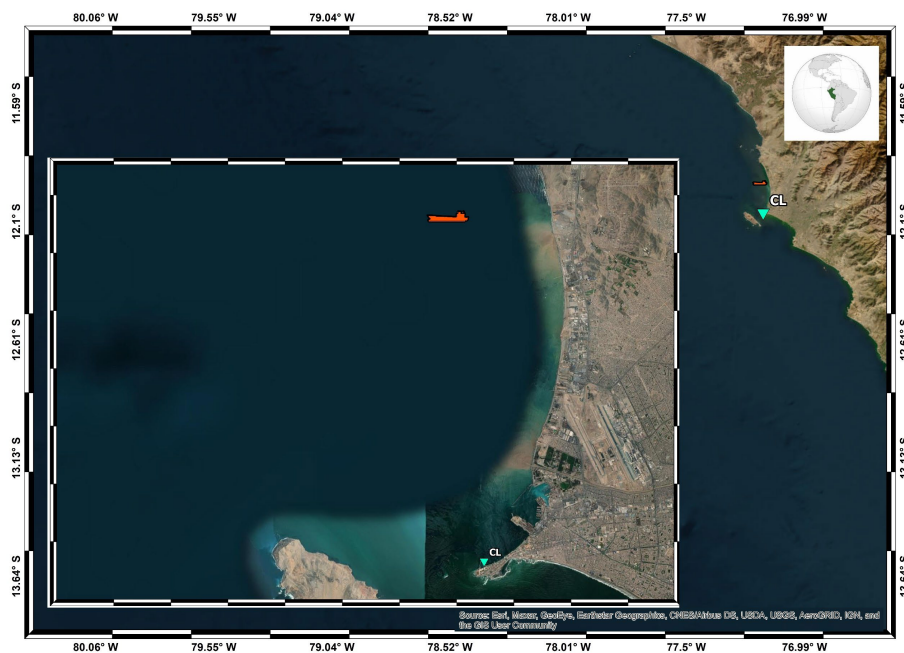

142

143 **Figure 3. Callao Bay and location of the vessel (Orange vessel) in the offshore port of La Pampilla, Peru.**

144 To simulate the VMT triggered by the explosion of the HTHH volcano, we used the finite volume GeoClaw  
145 code equipped with atmospheric pressure forcing terms that are handled using the flux-splitting method in  
146 momentum balance (Mandli and Dawson, 2014). This numerical code was validated in various

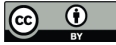

147 meteotsunami studies (Kim and Omira, 2021; Kim et al., 2022; Omira et al., 2022). The determination of  
148 atmospheric source terms is based on barometric records from three distinct-selected observations in **B1**,  
149 **B6**, and **B8** (see Table 1 for details). We assumed the symmetrical propagation of atmospheric pressure  
150 from the source (HTHH volcano) at a constant speed of 310 m/s. Since a point source simulation on a  
151 sphere has two singularities (at the origin and antipode), we used a relaxation method as described in Omira  
152 et al. (2022).

153 Initially, our computational domain is between 40°S to 40°N and 170°E to 65°W, with a coarse bathymetry  
154 resolution of 1 degree, as obtained from GEBCO (<https://www.gebco.net/>). To achieve a finer spatial  
155 representation of the study area (i.e., Callao Bay), we employed four levels of refinement with resolutions  
156 of 1°, 1°/5, 1°/30, and 1°/2, using an adaptive mesh refinement (AMR), with a maximum refinement level  
157 of 3 across the entire domain. The full resolution of approximately 800 meters was reinforced near Callao  
158 Bay with local higher-resolution bathymetry data (GEOGPS PERÚ, <https://www.geogpsperu.com/>). To  
159 account for the bottom friction, GeoClaw software uses Manning's formulation, and the Manning  
160 coefficient of 0.02 was considered in this work. Our simulations were conducted using the Madsen's  
161 Boussinesq-type equations, with a constant value of  $B = 1/15$  (Kim et al., 2017; Madsen and Sørensen,  
162 1992).

163 The computation was performed on Intel Core i7-8700 CPU 3.2GHz using 10 cores corresponding to 1161  
164 hours of propagation time, and 119 hours of wall time.

#### 165 **2.4. Stresses in moored ships model**

166 Here, we use an analytical model to estimate the loads on a vessel's mooring system under the  
167 hydrodynamic effects of a tsunami (Tahar and Kim, 2004; OCIMF, 2010). The vessel is modelled as a rigid  
168 body with six degrees of freedom (DOFs). The first three DOFs are the surge, sway, and heave ( $x$ ,  $y$ , and  $z$ )  
169 of the vessel's centre of gravity ( $C_{OG}$ ), given in the global frame (Figure 4). The other three are the Euler  
170 angles, roll, pitch, and yaw ( $\alpha$ ,  $\beta$ , and  $\gamma$ ), which describe the local frame rotation status with respect to the  
171 global frame.

172 We considered two reference frames, the first of which is a global orthogonal inertial frame (fixed) with its  
173 origin located somewhere at the mean water level, where the X-axis points eastward and the Z-axis points  
174 upward for the global frame. The second is an orthogonal non-inertial frame, moving with the vessel, with  
175 its origin located at the  $C_{OG}$ . The X-axis points toward the bow while the Z-axis points upward for the local  
176 frame. The roll and pitch initial equilibrium positions are considered at zero degrees.

177



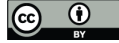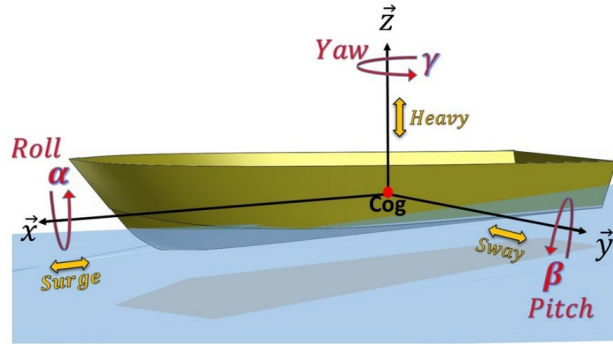

178

179 **Figure 4. Definition of Ship Motions in Six Degrees of Freedom, the yellow ones describe translation and the red**  
 180 **ones rotation.**

181 The model contemplates the vessel's hydromechanics and physics characteristics such as hydrostatic  
 182 stiffness (which considers both buoyancy and gravity forces), vessel mass ( $m$ ), metacentric heights ( $GM_{t,l}$ ),  
 183 and inertial forces defined by the vessel's moments of inertia around the principal axes ( $I_{x,y,z}$ ) as well as  
 184 describing the vessel's stability (Journée and Massie, 2001). The vessel's dynamics are described with the  
 185 equations of a forced and damped mass-spring system which allows the following initial value problem  
 186 (Eq. 1):

$$187 \begin{cases} \dot{Y} = f(Y, t) = \begin{bmatrix} \dot{\xi} \\ \ddot{\xi} \end{bmatrix} = \begin{bmatrix} \dot{\xi} \\ M^{-1} \cdot [B \cdot \dot{\xi} + G \cdot (\xi - \xi_0(t)) + F_m(\xi) + F_d(\xi, t)] \end{bmatrix} \\ Y(t = 0) = Y_0 \end{cases} \quad (1)$$

188 where  $Y_0$  is the initial vessel state vector, containing the initial position and the speed of the vessel,  $B$  is the  
 189 damping matrix,  $G$  is the stiffness matrix,  $\xi$  is defined as the stacking of all the DOFs,  $\xi_0$  is the initial  
 190 equilibrium position, and  $F_m$  and  $F_d$  are the mooring system forces and the current drag forces (Figure 5).

191

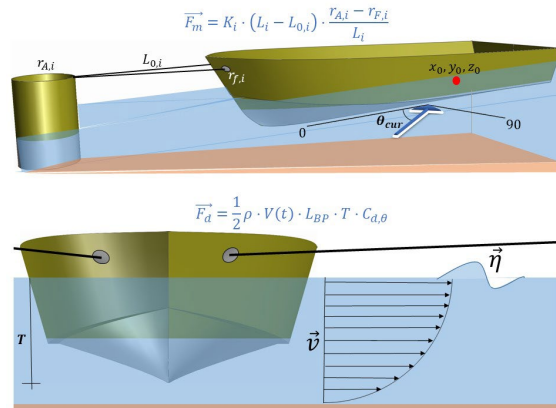

192

193 **Figure 5. Schematic layout of Ship Mooring system forces  $F_m$  and Drag Forces  $F_d$ . The dynamics of the moored**  
 194 **vessel are defined with a second-order ordinary differential equation (ODE)**



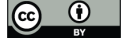

195 The mooring system  $F_m$  is exclusively considered when the movement of the vessel results in a greater  
196 increase in the length of the line  $L_i$  compared to the previous position, as shown in the following Eq. (2):

$$197 F_{m,i} = \begin{cases} K_i \cdot (L_i - L_{0,i}) \cdot \frac{r_{A,i} - r_{F,i}}{L_i}, & L_i > L_{0,i} \\ 0, & L_i \leq L_{0,i} \end{cases} \quad (2)$$

198 Where  $K_i$  includes Elastic properties for the  $i$ -th line,  $L_i$  is the line length,  $r_A$  and  $r_F$  are the pile and fairlead  
199 positions (where the line is tied to the hull). The Morison drag force model (Oh et al., 2020) is utilized to  
200 calculate the drag force  $F_d$ . The tsunami current at time  $t$  is defined by its speed. The current drag force  
201 changes depending on the angle of incidence, the  $F_{d,x,y}$ , calculated as Eq (3):

$$202 F_{d,x,y}(\xi, t) = \frac{1}{2} \rho \cdot V(t) \cdot L_{BP} \cdot T \cdot \begin{pmatrix} \cos(\gamma) & -\sin(\gamma) \\ \sin(\gamma) & \cos(\gamma) \end{pmatrix} \cdot \begin{pmatrix} C_x(|\theta(t)|) \\ C_y(|\theta(t)|) \cdot \text{sgn}(\theta(t)) \end{pmatrix} \quad (3)$$

203 Where  $C_x$  and  $C_y$  are the drag forces in the  $x$  and  $y$  axes,  $\rho$  is the water density,  $V(t)$  is the tsunami current  
204 velocity,  $L_{BP}$  is the length between the perpendicular,  $T$  is the vessel's draft, and  $\gamma$  is the Yaw DOF. We  
205 considers the tsunami current angle  $\theta$  to be parallel to the vessel's centerline at zero degrees. Finally, this  
206 first-order ODE is integrated with a Runge-Kutta-4-5 method implemented in the SciPy Python library  
207 (Dormand and Prince, 1980; Shampine, 1986).

208 The model inputs consist of the vessel's dimensions, hydromechanical and mass properties, the ship's  
209 berthing scheme (including piles and fairleads coordinates), the line properties (such as young modulus and  
210 length), and the temporal tsunami dynamics (including waves and currents time-series) at the vessel's  
211 location. The model outputs the movements in each DOF and the resulting stress, measured in tons, for  
212 each line throughout the time series.

### 213 3. Results

#### 214 3.1. Atmospheric and oceanic data analysis

215 The analysis using wavelets is based on the hypothesis that the atmospheric waves' integral characteristics,  
216 such as the periods and propagation velocities, remain reciprocal when resonance is generated between  
217 atmospheric and oceanic waves. This allows the current knowledge extrapolation about atmospheric waves,  
218 which have been extensively studied in the literature, and their effect on oceanic tsunami waves.

219 The results in Figure 6, Figure 7, and Figure 8 show the analysis of the recorded atmospheric and sea-level  
220 signals, which are composed of three panels for each sensor. The top panel shows the filtered time-series  
221 of both sea level and atmospheric pressure (blue and orange respectively). The orange arrow indicates the  
222 leading Lamb wave arrival time respectively. The lower panel shows the spectral results (wavelets) of the  
223 de-tided series of the ocean surface, the red-blue color scale marks the highest and lowest energy  
224 concentrations respectively; to the right is the Fourier spectrum obtained from integrating the wavelet over  
225 time.



226 Results in Figure 6 correspond to the tide gauges **NC**, **OW**, and **RI**, DART buoy **D3**, and pressure sensor  
227 **B1** (see Figure 1 for location). Wavelets consistently show four energy groups for sensors tide gauges **NC**,  
228 **OW**, **RI**, and DART buoy **D3**. These results allows for the identification of the initial characteristics of  
229 tsunami waves forced by atmospheric waves, i.e., the arrival times and wave periods.

230

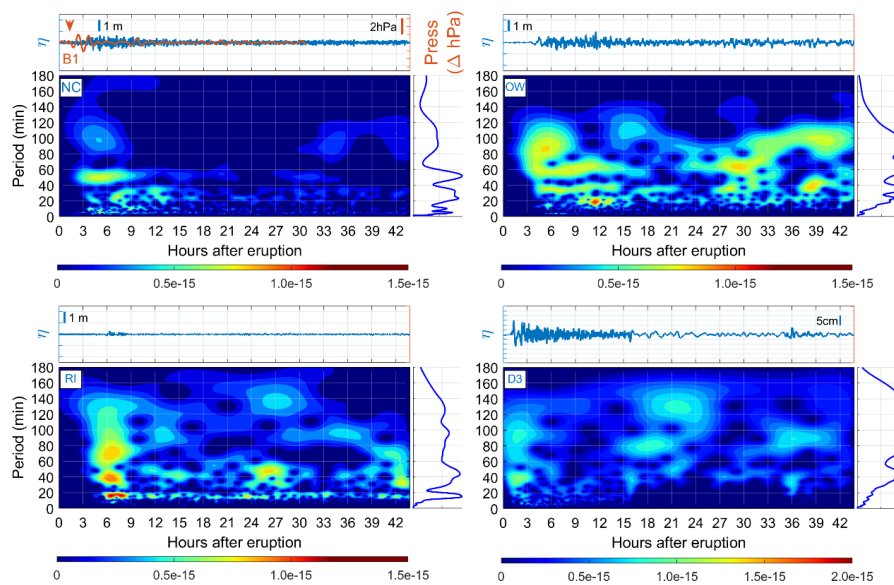

231

232 **Figure 6.** Analysis of air-pressure and sea-level records at tide gauges **NC** (North Cape, New Zealand), **OW**  
233 (**Owenga**, New Zealand) and **RI** (**Rikitea**, France), DART buoy **D3** (51425, NDBC), and air-pressure sensor **B1**  
234 (North Cape, New Zealand). For each sensor, the time series of the air-pressure sensor (orange line) and tide  
235 gauge (blue line) are shown in the upper panel. The orange arrow refers to the arrival time of the leading  
236 pressure pulse. The panel to the right of the wavelet is the resulting frequency spectrum (FFT) of the time  
237 integration of the wavelet.

238 The energy clusters fall within the 5-10 min, 20 to 40 min, 40 to 60 min, and 80-120 min periods, do the  
239 energy clusters suggest that there were multiple mechanisms that generated the Tonga tsunami waves.  
240 These results are consistent with the findings of previous studies (Hu et al., 2023; Kubota et al., 2022;  
241 Omira et al., 2022). The manometer station **B1** and tide gauge **NC** allow the estimation of the propagation  
242 velocities of the atmospheric disturbances as approximately 324 m/s.

243 Figure 7 shows far-field results (deep waters near the Peruvian coast) in sensors **D1-B3** and **D2-B5**. Air-  
244 pressure time-series shows the 2 hPa pulse associated with the leading Lamb wave arrived first, followed  
245 by second disturbances travelling at more than 200 m/s (Hu et al., 2022; Omira et al., 2022). DART buoy  
246 wavelets provide more spectral information related to the physical properties of these atmospheric waves  
247 coupled in the ocean. For example, DART Buoy **D2** shows that the first pulse coincides with the leading  
248 Lamb wave between 30- and 60- minute periods arriving 9 hours after the main eruption. Then, there is a  
249 group of energy contained in four ranges of periods: (i) about 10 min, (ii) between 20 and 40 min, (iii)  
250 between 60 and 90, and (iv) between 100 and 140 min. The latter is possibly associated with the air-ocean

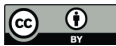

251 Proudman resonance that occurred on the Tonga Trench and propagated as common tsunami gravity waves  
 252 towards the Southern American coast (Omira et al., 2022).

253

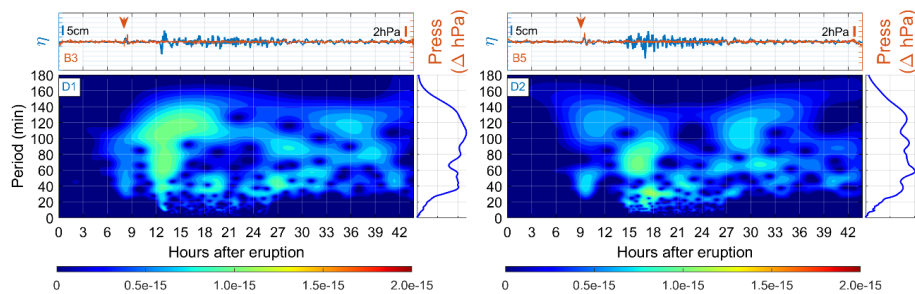

254

255 **Figure 7.** Analysis of air-pressure and sea-level records at DART buoys D1 (32413, NDBC)  
 256 NDBC) and atmospheric pressure sensors B3 (330031, Chile) and B5 (250005, Chile). For each sensor, the  
 257 filtered time series of the atmospheric pressure sensor (orange line) and tide gauge (blue line) are shown in the  
 258 upper panel. The orange arrow refers to the arrival of the leading pressure pulse. The right panel of the wavelet  
 259 is the frequency spectrum resulting from the time integration of the wavelet.

260 Figure 9 shows the spectral results for other locations along the Pacific American coasts. The South Pacific  
 261 American instruments are SA-B4 (Chile), AR-B8 (Chile), CL-B5 (Peru) and AL (Ecuador). The sensors  
 262 in Central and North America are ZT (Mexico) and AC (USA). The wavelets' results in Chile, Mexico,  
 263 and the USA show several energy groups: one in 40 - 60 min periods, another group between 20 - 40 min,  
 264 and finally, energy in periods less than 10 min. Those wavelets exhibit a pattern similar to that observed in  
 265 deep water sensors, with a notable difference regarding the absence of periods close to 120 min.

266 Subsequently, Figure 8 shows the analysis for sensors LA (Ecuador), CL-B5 (Peru), 15 km from the vessel  
 267 accident. The black dotted vertical line on the CL wavelet refers to the moment when the ship's moorings  
 268 break and the oil spill occurs, according to the captain of the ship Mare Doricum. It can be observed in the  
 269 CL wavelet that: (i) the Lamb wave coupled in the ocean (spectral energy between 30 - 60 min periods),  
 270 (ii) the mooring break moment coincides with the high period spectral energy (max between 110-130 min  
 271 period). Additionally, the energy within the 100 to 140 min period is present in deep water, (e.g., at DART  
 272 buoy D1 in Figure 4) and amplified exclusively in front of the Ecuador and Peru coasts (LA and CL tide  
 273 gauges).

274

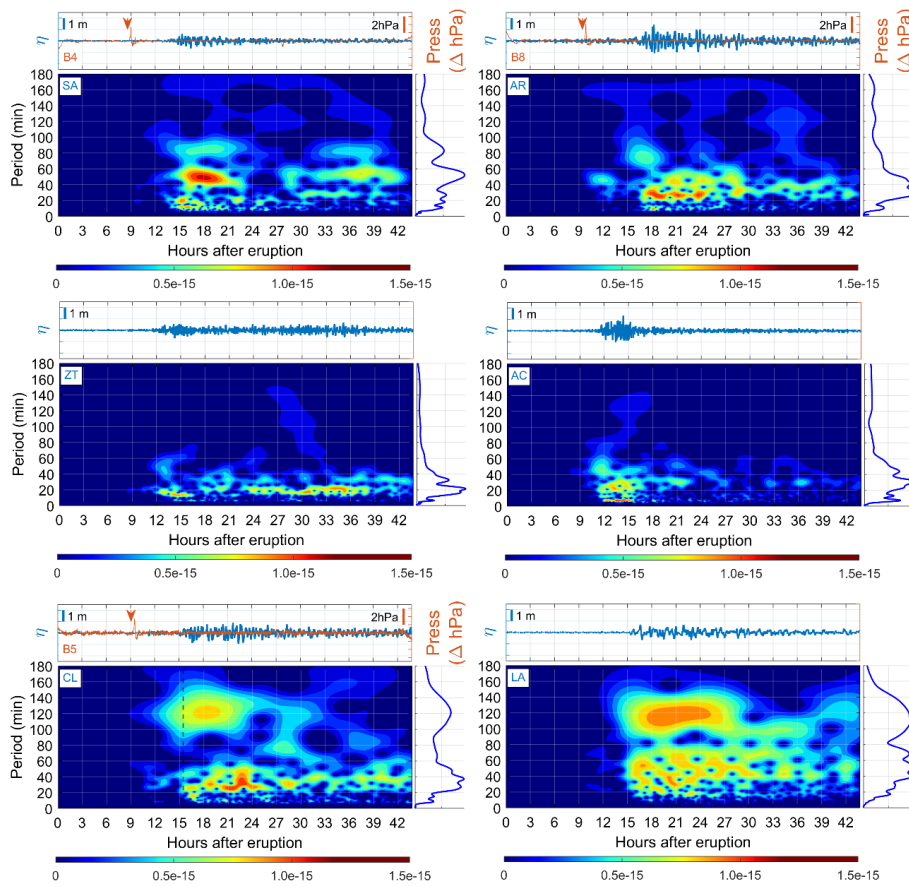

275

276 **Figure 8.** Analysis of air-pressure and sea level records at the tide gauges of SA (San Antonio, Chile), AR (Arica,  
 277 Chile), ZT (Zihuatanejo, Mexico), AC (California, USA), CL (Callao, Peru), and LA (La Libertad, Ecuador).  
 278 The upper panel shows the time series of the atmospheric pressure sensor (orange line) and tide gauge (blue  
 279 line). The orange arrow refers to the arrival of the leading Lamb wave. For the lower panel, we have the Wavelet.  
 280 The vertical black dashed line in the CL wavelet refers to the instant when the vessel's moorings broke at La  
 281 Pampilla port, Peru. The panel to the right of the wavelet is the frequency spectrum.

### 282 3.2. Numerical modelling of atmospheric pressure-induced tsunami waves

283 The numerical simulations have been calibrated/validated using both far- and near-field instrumental data.  
 284 After validation, the significance of tsunami-like waves induced by atmospheric acoustic-gravity waves  
 285 and tsunami-induced waves resulting from the submarine explosion were analyzed. We present the results  
 286 in Figure 9, which shows the observed and simulated tsunami waveforms near the coast of Peru.

287 A comparison of observed and simulated tsunami waveforms at DART buoys (D1 and D2) shows that the  
 288 Boussinesq numerical model correctly reproduces the first tsunami wave. It also fairly reproduces the  
 289 second train of tsunami waves, likely associated with air-ocean resonance in deep ocean (near Tonga  
 290 trench), and travelling at common tsunami speeds (Omira et al., 2022; Hu et al., 2023; Kubota et al., 2022).  
 291 In shallow waters, the model correctly reproduces the tide gauges LA and CL (closest to the port of La



292 Pampilla in Peru.), like in deep waters. It is interesting to note that the model succeeded in correctly  
 293 reproducing the 120-minute long-period wave (also observed in deep water).

294

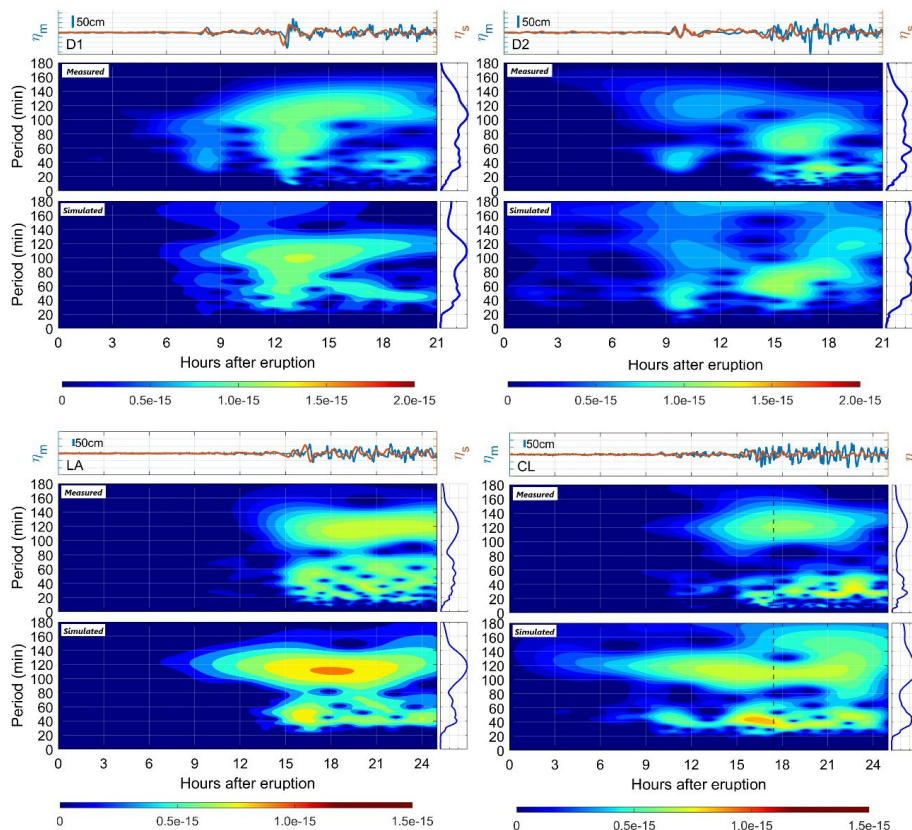

295

296 **Figure 9. Validation of numerical results at DART D1 and D2 buoys and tide gauges CL (Callao, Peru), and LA**  
 297 **(La Libertad, Ecuador). For each buoy, the measured (blue line) and simulated (orange line) time series are**  
 298 **shown in the upper panel. The lower panel shows the measured free sea surface wavelets (upper wavelet) and**  
 299 **numerical simulation (lower wavelet). The vertical black dashed line in CL refers to the instant of the vessel**  
 300 **mooring break in La Pampilla harbor, Peru. The panel to the right of each wavelet is the frequency spectrum.**

301 In general, an adequate VMT simulation is achieved, then the wavelets and Fourier transform show a correct  
 302 trend of the wave characteristics measured in each sensor, as shown in Figure 9. Wavelets corresponding  
 303 to both deep and shallow waters present several groups of waves forced by acoustic waves between 20-40  
 304 minutes, periods 40-60 min, and long-period waves about 120 min (Hu et al., 2023; Kubota et al., 2022;  
 305 Omira et al., 2022). Likewise, the Fourier spectra also show two distinguished groups of 40-60 min and  
 306 100-120 min in shallow water.

307 Compared to the DART buoys, the simulations exhibit similar behaviours because they are located at great  
 308 depths, where the influence of the bathymetry and the land boundaries is negligible. The simulations  
 309 demonstrate that tide gauges reveal variations such as earlier arrival times or more energy, possibly



310 associated with local effects and limitations in resolution. However, the model’s results are similar to the  
 311 measured data.

312 Figure 10 displays simulation results for shallow water tide gauges **GL** and **SA** (located north and south of  
 313 Peru, respectively), demonstrating that the 120-minute period wave is exclusive of the coast of Peru and is  
 314 likely intensified by local effects. The wavelet analysis indicates that neither the simulated nor the measured  
 315 waves show a significant amplification of high-period energy, as seen in the sensors situated off the coast  
 316 of Peru.

317

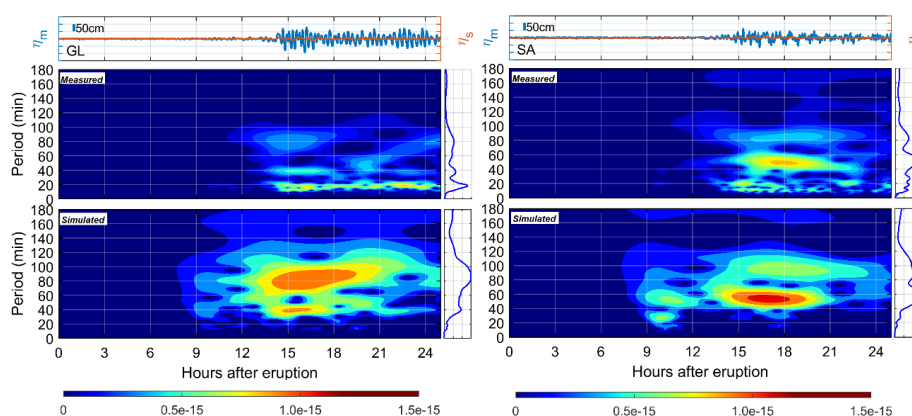

318

319 **Figure 10.** Comparisons of the numerical results at the GL (Galapagos, Ecuador) and SA (San Antonio, Chile)  
 320 tide gauges are shown. For each tide gauge, the measured (blue line) and simulated (orange line) time series are  
 321 shown in the upper panel. The lower panel has measured (upper wavelet) and simulated (lower wavelet) ocean  
 322 results. The panel to the right of each wavelet is the frequency spectrum.

### 323 3.3. Vessel response due to acoustic and tsunami waves

324 The model described in Section 2.4 was implemented to estimate the mooring stresses due to tsunami  
 325 hydrodynamic effects produced during the Tonga event. The purpose is to demonstrate the variability in  
 326 stress levels when exposed to tsunami waves of varying periods and, therefore, different hydrodynamic  
 327 conditions.

328 The current velocity and water elevation time-series were extracted from the Boussinesq tsunami model,  
 329 presented in Section 2.3 and validated in Section 3.2 at coordinates 11°56' S, 77°11' W, the location of  
 330 Terminal 2 of La Pampilla port (as shown in Figure 3). Figure 11 describes the mooring scheme. Each pile  
 331 is defined as immovable to focus stresses on every line. The scheme is similar to the one found in Terminal  
 332 2 of the Port of La Pampilla in Peru during the mooring-break accident.



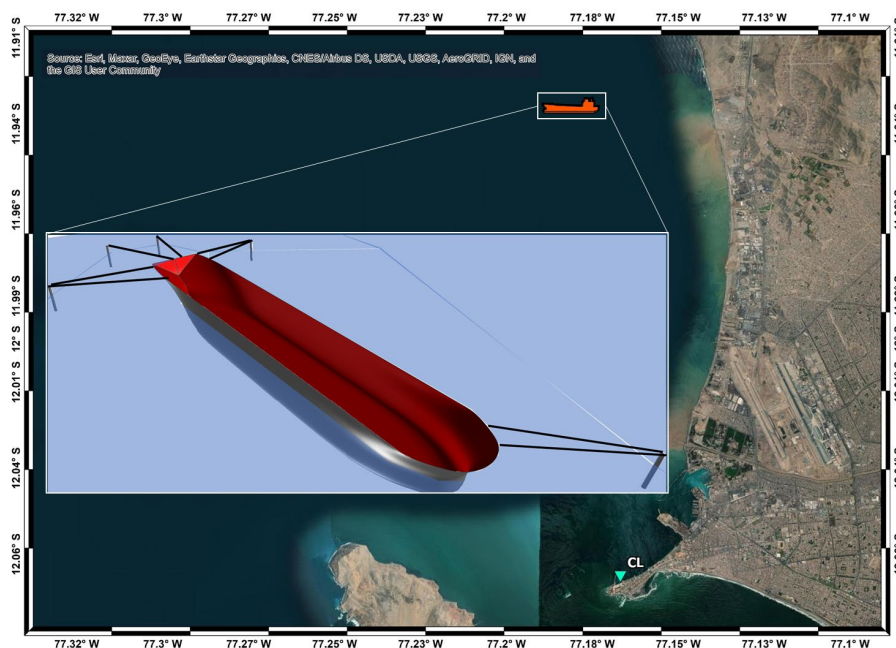

333

334 **Figure 11. La Pampilla port location (square in left map) and berthing scheme implemented in the mooring lines**  
 335 **stress model (right panel).**

336 In Tables 2 and 3 presents the vessel’s description and its hydromechanical characteristics. The entire  
 337 mooring system schematic and the data used in the model are provided. The vessel used in this study is not  
 338 the oil tanker Mare Doricum, but rather one with comparable physical characteristics. The vessel is moored  
 339 to five buoys with eight moorings, one forward and four at the stern (in addition to two stern anchors  
 340 anchored at a depth of 18 meters). The ship is considered fully loaded throughout the simulation. (Figure  
 341 12).

|              |           |                    |
|--------------|-----------|--------------------|
| LOA          | 274       | m                  |
| Beam         | 48        | m                  |
| draft        | 8         | m                  |
| Mass         | 119.311   | Ton                |
| Xcg          | 118.3     | m                  |
| Ycg          | 0         | m                  |
| Zcg          | -6.65     | m                  |
| Ixx          | 21470000  | Ton m <sup>2</sup> |
| Iyy          | 515780000 | Ton m <sup>2</sup> |
| Izz          | 515780000 | Ton m <sup>2</sup> |
| MGt          | 20.042    | m                  |
| MGl          | 471.824   | m                  |
| Displacement | 100,434   | Ton                |





|                 |             |                |
|-----------------|-------------|----------------|
| Waterplane area | 9920.68     | m <sup>2</sup> |
| Gz              | 99949.56131 | Ton m          |
| Groll           | 2012895.542 | Ton m          |
| Gpitch          | 47387108.39 | Ton m          |

342 **Table 2. Description of the vessel used in the mooring stress simulation**

343

| Line number | Pile position $r_{A,i}$ (m,m,m) | Fairlead position $r_{f,i}$ (m,m,m) | Length $L_{0,i}$ (m) |
|-------------|---------------------------------|-------------------------------------|----------------------|
| 0           | (208.27, 80.13, 3.00)           | (138.34, 5.65, 6.00)                | 103.21               |
| 1           | (208.27, 80.13, 3.00)           | (121.00, 13.42, 6.00)               | 115.78               |
| 2           | (-152.09, 96.13, 3.00)          | (-85.20, 24.30, 6.00)               | 105.64               |
| 3           | (-152.09, 96.13, 3.00)          | (-92.13, 23.61, 6.00)               | 103.54               |
| 4           | (-220.98, 25.94, 3.00)          | (-118.19, 3.57, 6.00)               | 107.30               |
| 5           | (-225.43, -57.61, 3.00)         | (-117.98, -4.43, 6.00)              | 125.63               |
| 6           | (-184.75, -120.44, 3.00)        | (-89.22, -23.95, 6.00)              | 136.73               |
| 7           | (-184.75, -120.44, 3.00)        | (-82.04, -24.33, 6.00)              | 142.59               |

344 **Table 3. Description of the mooring system used in the stress simulation**

345

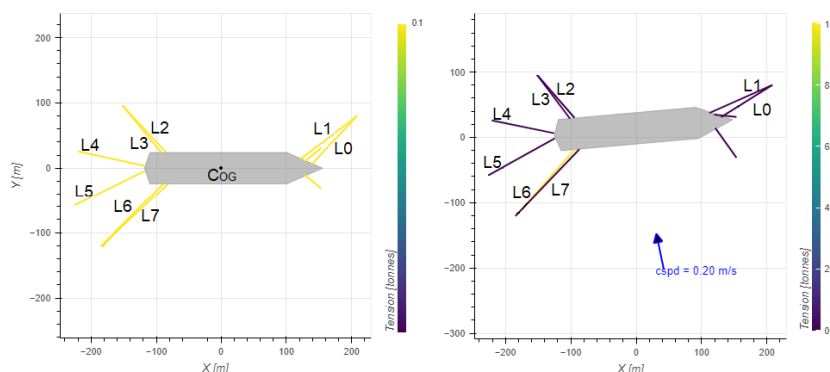

346

347 **Figure 12. On the left is the initial layout with the origin at the ship's COG and on the right is the layout at the**  
 348 **moment of mooring breakage, where the yellow and purple colors mark the maximum and minimum stress**  
 349 **values, respectively.**

350 The results of the DOFs along the simulation are presented in Figure 13. The first instances of ship  
 351 movement occur about 9 to 10 hours after the volcano erupts, coinciding with the arrival of atmospheric  
 352 waves (VMT), with variations in the order of 2 m, 8 m, and 2 degrees for the DOFs Surge, Sway, and Yaw,  
 353 respectively, in the movements directly associated with tsunami hydrodynamic loads (López and Iglesias,  
 354 2014). Then, 15 hours after the eruption, when the 120-minute period wave is present and the mooring  
 355 breaks, further ship motion is generated, drastically increasing the vessel mentioned above DOFs values.  
 356 The model results indicate that the movement was caused by the VMT. The anchored ship aligns with the  
 357 surge, sway, and yaw; with a maximum deviation of 9 meters, 14 meters, and 5 degrees, respectively, which  
 358 is more than enough to produce the breakage of the mooring system according to the port authority of La  
 359 Pampilla (CPAAAAE, 2023).

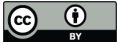

360

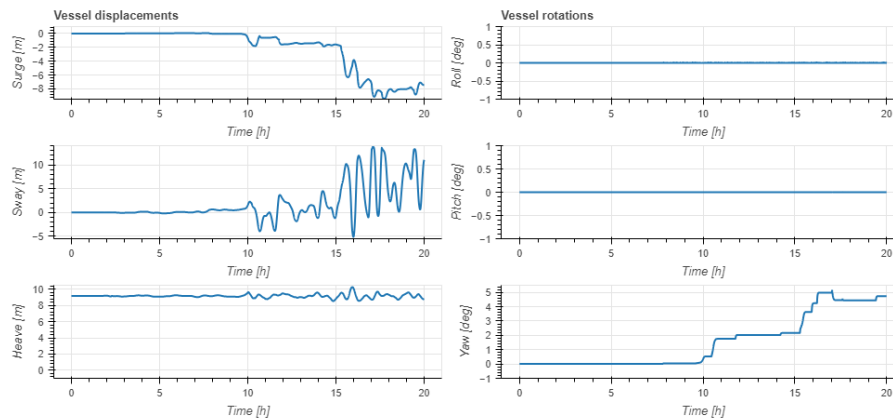

361

362 **Figure 13. Time series of ship 6 degrees of freedom obtained from numerical simulation. Measured in hours**  
363 **after the eruption.**

364 To support the hypothesis that the 120-minute long-period wave along the Peruvian coast caused the  
365 mooring to break, a comparison was made between the stresses obtained by forcing with the VMT time-  
366 series and the tsunami caused only by the submarine explosion. The stress results for each line in both cases  
367 are shown in Figure 14. This illustration shows two things. Firstly, with the VMT, the lines that are primarily  
368 under stress are the starboard moorings lines number 0, 4, and 6, the latter having the maximum load (96  
369 tons), which exceeds the Minimum Breaking Load (MBL) by more than 10 tons. The increase in stresses  
370 was due to the configuration of the mooring layout, tsunami wave direction, and hydrodynamic effects,  
371 which could cause the mooring line to break. Secondly, the findings suggest that the VMT results in a  
372 significant increase in mooring stresses, exceeding 10-times the levels observed during the tsunami-only  
373 event (where the VMT is not included in the simulation). These results confirm that the atmospheric waves  
374 generated during the volcanic eruption have transmitted energy to the ocean, generating tsunami-like waves  
375 that have affected the far field.

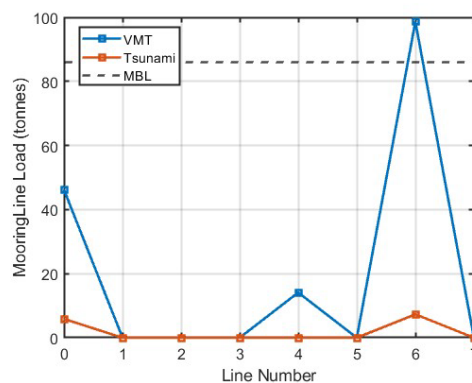

376

377 **Figure 14. Maximum stresses obtained from the simulation at each mooring. Blue and orange lines represent**  
378 **the results of the simulations with and without atmospheric waves, respectively.**



379 **4. Conclusions**

380 The propagation of atmospheric waves and their coupling with the ocean were extensively studied  
381 following the Tonga event. Although epistemic uncertainties associated with the event are important, it was  
382 possible to understand the main forcings and effects of the volcano-meteorological tsunami (VMT) in the  
383 far-field, where the atmospheric waves were the dominant generation mechanism. The air-ocean Proudman  
384 resonance in deep water was the driving mechanism that caused sizeable gravity waves, which had very  
385 similar characteristics to those of a tectonic-source tsunami.

386 The potential of the explosion-induced atmospheric waves to magnify tsunamis once they pass over oceanic  
387 regions of great depth has become apparent. This happened near the Tonga trench in the propagation  
388 direction of South America (Figure 3-c in Omira et al., 2022), helping to understand the origin of long-  
389 period tsunami waves propagated toward Peru. The spectral analysis results establish the influence of the  
390 atmospheric waves generated by the HTHH volcano.

391 The presence of the high period waves exclusively in the tide gauges of Peru and Ecuador (CL and LA,  
392 respectively) could be explained by several processes associated with shoaling. These processes could  
393 include the width and slope of the continental shelf (which is wider on the Peruvian coast than on the  
394 Chilean coast, for example) and the effects associated with topographic boundaries and their geometry,  
395 such as the natural bay oscillation modes.

396 Considering that, the 120-minutes long-period waves were associated with the air-ocean-resonance of the  
397 Tonga event and that numerical simulations additionally show the mooring line stress using the VMT time-  
398 series, it is possible to conclude that the Tonga tsunami caused the overstressing and subsequent accident  
399 in the port of La Pampilla, Peru.

400 Various processes, including hydrodynamic loads on the ship's hull, can threaten the stability of moored  
401 vessels. These loads primarily affect the horizontal plane, which influences the sway, surge, and yaw  
402 degrees of freedom. The VMT produced during the Tonga 2022 event was accompanied by long-period  
403 waves and currents, which could affect the stability of the mooring system in the port of La Pampilla, Peru.

404 The hydrodynamic effects that these very long-period waves can cause in port environments can generate  
405 damages similar to those of tectonic-source tsunamis, affecting infrastructure, vessels, and merchandise.  
406 One unique characteristic of VMT events is that their waves do not dissipate energy with a ratio of  $r^{-1/2}$   
407 (where  $r$  is the distance from the generation origin). Instead, they can be amplified thousands of kilometers  
408 away from their origin, presenting an increased threat to the stability of port environments in the far field.

409 **4.1. Final Considerations**

410 Coastal and port infrastructure are not prepared to respond preventively to these Tonga-type tsunamis,  
411 leaving them "unprotected", as tsunami warnings are not issued once a volcano eruption is known.  
412 Furthermore, in the analyzed event, the initial ocean disturbance arrived earlier than anticipated because

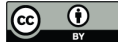

413 the atmospheric waves produced a VMT that travelled at sonic velocity. This statement holds relevance as  
414 state and international authorities are responsible for maritime safety and the creation of cautions-warnings  
415 and suggestions to aid distinct users in coastal and offshore locations.

416 This event showed the need for Tsunami Early Warning Systems (TWS) to be prepared to include  
417 atmospheric waves and detect them from existing monitoring sensors. In addition, Standard Operational  
418 Procedures need to include protocols for these events to avoid damage to port facilities and ships, such as  
419 the breaking of moorings and ship collisions. These events can also generate local flooding increasingly far  
420 away from the origin and affect the population and coastal infrastructures (cities, nuclear reactors,  
421 petrochemical industry, etc.). Therefore, efforts towards the incorporation of tsunamis caused by volcanic  
422 acoustic waves in tsunami warning systems are needed.

#### 423 **5. Author contribution**

424 Supervision and methodology (G.M and A-Q.I); Waves simulations (K.J and O.R); revision (B.M and O.R).  
425 All authors have read and agreed to the published version of the manuscript.

#### 426 **6. Competing interests**

427 At least one of the co-authors is a member of the editorial board of Natural Hazards and Earth System  
428 Sciences.

#### 429 **7. Acknowledgement**

430 This research was supported by an FPU (Formación de Profesorado Universitario) grant from the Spanish  
431 Ministry of Science and Innovation (MCINN) to the first author. We have gratitude to The Ocean Energy  
432 and Offshore Engineering Group of IHCANTABRIA for the model of mooring stresses. In addition, the  
433 authors of this work would like to thank the various state institutions that have provided measured  
434 atmospheric data mentioned in Chapter 2: IDEAM (Colombia), SENAMHI (Perú), DGAC (Chile), NIWA  
435 (New Zealand), NOAA (USA) and IOC.

#### 436 **8. References**

- 437 Abe, K.: Synthesis of a Tsunami Spectrum in a Semi-Enclosed Basin Using Its Background Spectrum, *Pure*  
438 *Appl. Geophys.*, 168, 1101–1112, <https://doi.org/10.1007/s00024-010-0222-x>, 2011.
- 439 Ana Baptista, M., Miguel Miranda, J., Batlló, J., Lisboa, F., Luis, J., and Maciá, R.: New study on the 1941  
440 Gloria Fault earthquake and tsunami, *Nat. Hazards Earth Syst. Sci.*, 16, 1967–1977,  
441 <https://doi.org/10.5194/nhess-16-1967-2016>, 2016.
- 442 Antonopoulos, J.: The great Minoan eruption of Thera volcano and the ensuing tsunami in the Greek  
443 Archipelago, *Nat. Hazards*, 5, 153–168, <https://doi.org/10.1007/BF00127003>, 1992.



- 444 Ayca, A. and Lynett, P. J.: Effect of tides and source location on nearshore tsunami-induced currents, *J.*  
445 *Geophys. Res. Ocean.*, 121, 8807–8820, <https://doi.org/10.1002/2016JC012435>, 2016.
- 446 Ayca, A. and Lynett, P. J.: DEBRIS AND VESSEL TRANSPORT DUE TO TSUNAMI CURRENTS IN  
447 PORTS AND HARBORS, *Coast. Eng. Proc.*, 68, <https://doi.org/10.9753/icce.v36.currents.68>, 2018.
- 448 Ayca, A. and Lynett, P. J.: Modeling the motion of large vessels due to tsunami-induced currents, *Ocean*  
449 *Eng.*, 236, 109487, <https://doi.org/10.1016/j.oceaneng.2021.109487>, 2021.
- 450 Belousov, A., Voight, B., Belousova, M., and Muravyev, Y.: Tsunamis generated by subaquatic volcanic  
451 explosions: Unique data from 1996 Eruption in Karymskoye Lake, Kamchatka, Russia, *Pure Appl.*  
452 *Geophys.*, 157, 1135–1143, <https://doi.org/10.1007/s000240050021>, 2000.
- 453 CPAAAAE: Informe Final sobre las acciones de los funcionarios públicos y privados que ocasionaron el  
454 derrame de petróleo de la Empresa Multinacional REPSOL YPF S.A., Lima, 421 pp., 2023.
- 455 Dogan, G. G., Yalciner, A. C., Annunziato, A., Yalciner, B., and Necmioglu, O.: Global propagation of air  
456 pressure waves and consequent ocean waves due to the January 2022 Hunga Tonga-Hunga Ha’apai  
457 eruption, *Ocean Eng.*, 267, 113174, <https://doi.org/10.1016/j.oceaneng.2022.113174>, 2023.
- 458 Dormand, J. R. and Prince, P. J.: A family of embedded Runge-Kutta formulae, *J. Comput. Appl. Math.*, 6,  
459 19–26, [https://doi.org/10.1016/0771-050X\(80\)90013-3](https://doi.org/10.1016/0771-050X(80)90013-3), 1980.
- 460 Falvard, S., Paris, R., Belousova, M., Belousov, A., Giachetti, T., and Cuven, S.: Scenario of the 1996  
461 volcanic tsunamis in Karymskoye Lake, Kamchatka, inferred from X-ray tomography of heavy minerals in  
462 tsunami deposits, *Mar. Geol.*, 396, 160–170, <https://doi.org/10.1016/j.margeo.2017.04.011>, 2018.
- 463 Hamilton, G. D.: National Data Buoy Center Programs, *Bull. Am. Meteorol. Soc.*, 67, 411–415,  
464 [https://doi.org/10.1175/1520-0477\(1986\)067<0411:NDBCP>2.0.CO;2](https://doi.org/10.1175/1520-0477(1986)067<0411:NDBCP>2.0.CO;2), 1986.
- 465 Hayward, M. W., Whittaker, C. N., Lane, E. M., Power, W. L., Popinet, S., and White, J. D. L.:  
466 Multilayer modelling of waves generated by explosive subaqueous volcanism, *Nat. Hazards Earth Syst.*  
467 *Sci.*, 22, 617–637, <https://doi.org/10.5194/nhess-22-617-2022>, 2022.
- 468 Hu, G., Li, L., Ren, Z., and Zhang, K.: The characteristics of the 2022 Tonga volcanic tsunami in the Pacific  
469 Ocean, *Nat. Hazards Earth Syst. Sci.*, 23, 675–691, <https://doi.org/10.5194/nhess-23-675-2023>, 2023.
- 470 Hu, Y., Li, Z., Wang, L., Chen, B., Zhu, W., Zhang, S., Du, J., Zhang, X., Yang, J., Zhou, M., Liu, Z.,  
471 Wang, S., Miao, C., Zhang, L., and Peng, J.: Rapid Interpretation and Analysis of the 2022 Eruption of  
472 Hunga Tonga-Hunga Haapai Volcano with Integrated Remote Sensing Techniques, *Wuhan Daxue Xuebao*  
473 *(Xinxi Kexue Ban)/Geomatics Inf. Sci. Wuhan Univ. [J]*, 47, 242–251,  
474 <https://doi.org/10.13203/J.WHUGIS20220050>, 2022.
- 475 Imamura, F., Suppasri, A., Arikawa, T., Koshimura, S., Satake, K., and Tanioka, Y.: Preliminary  
476 Observations and Impact in Japan of the Tsunami Caused by the Tonga Volcanic Eruption on January 15,  
477 2022, *Pure Appl. Geophys.*, 179, 1549–1560, <https://doi.org/10.1007/s00024-022-03058-0>, 2022.
- 478 Inoue, Y., Rafiqul Islam, M., and Murai, M.: Effect of wind, current and non-linear second order drift forces  
479 on a moored multi-body system in an irregular sea, in: *Oceans Conference Record (IEEE)*, 1915–1922,  
480 <https://doi.org/10.1109/oceans.2001.968139>, 2001.
- 481 Sea level station monitoring facility: <https://www.ioc-sealevelmonitoring.org/station.php?code=call>, last  
482 access: 1 February 2022.
- 483 Journée, J. M. J. and Massie, W. W.: *Offshore Hydromechanics*, First Edition,



- 484 <https://ocw.tudelft.nl/courses/offshore-hydrmechanics/>, 2001.
- 485 Kienle, J., Kowalik, Z., and Murty, T. S.: Tsunamis generated by eruptions from Mount St. Augustine  
486 Volcano, Alaska, <https://doi.org/10.1126/science.236.4807.1442>, 1987.
- 487 Kim, J. and Omira, R.: The 6–7 July 2010 meteotsunami along the coast of Portugal: insights from data  
488 analysis and numerical modelling, *Nat. Hazards*, 106, 1397–1419, [https://doi.org/10.1007/s11069-020-](https://doi.org/10.1007/s11069-020-04335-8)  
489 04335-8, 2021.
- 490 Kim, J., Pedersen, G. K., Løvholt, F., and LeVeque, R. J.: A Boussinesq type extension of the GeoClaw  
491 model - a study of wave breaking phenomena applying dispersive long wave models, *Coast. Eng.*, 122, 75–  
492 86, <https://doi.org/10.1016/j.coastaleng.2017.01.005>, 2017.
- 493 Kim, J., Choi, B. J., and Omira, R.: On the Greenspan resurgence of meteotsunamis in the Yellow Sea—  
494 insights from the newly discovered 11–12 June 2009 event, *Nat. Hazards*, 114, 1323–1340,  
495 <https://doi.org/10.1007/s11069-022-05427-3>, 2022.
- 496 Kirby, J. T., Grilli, S. T., Horrillo, J., Liu, P. L.-F., Nicolsky, D., Abadie, S., Ataie-Ashtiani, B., Castro, M.  
497 J., Clous, L., Escalante, C., Fine, I., González-Vida, J. M., Løvholt, F., Lynett, P., Ma, G., Macías, J.,  
498 Ortega, S., Shi, F., Yavari-Ramshe, S., and Zhang, C.: Validation and inter-comparison of models for  
499 landslide tsunami generation, *Ocean Model.*, 170, 101943, <https://doi.org/10.1016/j.ocemod.2021.101943>,  
500 2022.
- 501 Kubota, T., Saito, T., and Nishida, K.: Global fast-traveling tsunamis driven by atmospheric Lamb waves  
502 on the 2022 Tonga eruption, *Science (80-. )*, 377, 91–94, <https://doi.org/10.1126/science.abo4364>, 2022.
- 503 López, M. and Iglesias, G.: Long wave effects on a vessel at berth, *Appl. Ocean Res.*, 47, 63–72,  
504 <https://doi.org/10.1016/j.apor.2014.03.008>, 2014.
- 505 Lynett, P., McCann, M., Zhou, Z., Renteria, W., Borrero, J., Greer, D., Fa’anunu, O., Bosserelle, C., Jaffe,  
506 B., La Selle, S. P., Ritchie, A., Snyder, A., Nasr, B., Bott, J., Graehl, N., Synolakis, C., Ebrahimi, B., and  
507 Cinar, G. E.: Diverse tsunamigenesis triggered by the Hunga Tonga-Hunga Ha’apai eruption, *Nature*, 609,  
508 728–733, <https://doi.org/10.1038/s41586-022-05170-6>, 2022.
- 509 Lynett, P. J., Borrero, J. C., Weiss, R., Son, S., Greer, D., and Renteria, W.: Observations and modeling of  
510 tsunami-induced currents in ports and harbors, *Earth Planet. Sci. Lett.*, 327–328, 68–74,  
511 <https://doi.org/10.1016/j.epsl.2012.02.002>, 2012.
- 512 Madsen, P. A. and Sørensen, O. R.: A new form of the Boussinesq equations with improved linear  
513 dispersion characteristics. Part 2. A slowly-varying bathymetry, *Coast. Eng.*, 18, 183–204,  
514 [https://doi.org/10.1016/0378-3839\(92\)90019-Q](https://doi.org/10.1016/0378-3839(92)90019-Q), 1992.
- 515 Mandli, K. T. and Dawson, C. N.: Adaptive Mesh Refinement for Storm Surge, *Ocean Model.*, 75, 36–50,  
516 <https://doi.org/10.1016/j.ocemod.2014.01.002>, 2014.
- 517 Matoza, R. S., Fee, D., Assink, J. D., Iezzi, A. M., Green, D. N., Kim, K., Toney, L., Lecocq, T.,  
518 Krishnamoorthy, S., Lalande, J. M., Nishida, K., Gee, K. L., Haney, M. M., Ortiz, H. D., Brissaud, Q.,  
519 Martire, L., Rolland, L., Vergados, P., Nippess, A., Park, J., Shani-Kadmiel, S., Witsil, A., Arrowsmith,  
520 S., Caudron, C., Watada, S., Perttu, A. B., Taisne, B., Mialle, P., Le Pichon, A., Vergoz, J., Hupe, P., Blom,  
521 P. S., Waxler, R., De Angelis, S., Snively, J. B., Ringler, A. T., Anthony, R. E., Jolly, A. D., Kilgour, G.,  
522 Averbuch, G., Ripepe, M., Ichihara, M., Arciniega-Ceballos, A., Astafyeva, E., Ceranna, L., Cevuard, S.,  
523 Che, I. Y., De Negri, R., Ebeling, C. W., Evers, L. G., Franco-Marin, L. E., Gabrielson, T. B., Hafner, K.,



- 524 Harrison, R. G., Komjathy, A., Lacanna, G., Lyons, J., Macpherson, K. A., Marchetti, E., McKee, K. F.,  
525 Mellors, R. J., Mendo-Pérez, G., Mikesell, T. D., Munaibari, E., Oyola-Merced, M., Park, I., Pilger, C.,  
526 Ramos, C., Ruiz, M. C., Sabatini, R., Schwaiger, H. F., Tailpied, D., Talmadge, C., Vidot, J., Webster, J.,  
527 and Wilson, D. C.: Atmospheric waves and global seismoacoustic observations of the January 2022 Hunga  
528 eruption, *Science* (80-. ), 377, 95–100, <https://doi.org/10.1126/science.abo7063>, 2022.
- 529 Tonga Volcanic Eruption & Tsunami: [https://appliedsciences.nasa.gov/what-we-do/disasters/disasters-](https://appliedsciences.nasa.gov/what-we-do/disasters/disasters-activations/tonga-volcanic-eruption-tsunami-2022)  
530 [activations/tonga-volcanic-eruption-tsunami-2022](https://appliedsciences.nasa.gov/what-we-do/disasters/disasters-activations/tonga-volcanic-eruption-tsunami-2022), last access: 15 December 2022.
- 531 OCIMF: Estimating The Environmental Loads On Anchoring Systems, Oil Companies International  
532 Marine Forum, London, 33 pp., 2010.
- 533 Oh, M. J., Ham, S. H., and Ku, N.: The coefficients of equipment number formula of ships, *J. Mar. Sci.*  
534 *Eng.*, 8, 1–11, <https://doi.org/10.3390/jmse8110898>, 2020.
- 535 Ohgaki, K., Yoneyama, H., Suzuki, T., and IEEE: Evaluation on safety of moored ships and mooring  
536 systems for a tsunami attack, 2008.
- 537 Omira, R., Ramalho, R. S., Kim, J., González, P. J., Kadri, U., Miranda, J. M., Carrilho, F., and Baptista,  
538 M. A.: Global Tonga tsunami explained by a fast-moving atmospheric source, *Nat.* 2022 6097928, 609,  
539 734–740, <https://doi.org/10.1038/s41586-022-04926-4>, 2022.
- 540 Pakoksung, K., Suppasri, A., and Imamura, F.: The near-field tsunami generated by the 15 January 2022  
541 eruption of the Hunga Tonga-Hunga Ha’apai volcano and its impact on Tongatapu, Tonga, *Sci. Rep.*, 12,  
542 15187, <https://doi.org/10.1038/s41598-022-19486-w>, 2022.
- 543 Pararas-Carayannis, G.: The tsunami generated from the eruption of the volcano of Santorin in the Bronze  
544 Age, *Nat. Hazards*, 5, 115–123, <https://doi.org/10.1007/BF00127000>, 1992.
- 545 Pararas-Carayannis, G.: Volcanic tsunami generating source mechanisms in the eastern Caribbean region,  
546 *Sci. Tsunami Hazards*, 22, 74–114, 2004.
- 547 Paris, R.: Source mechanisms of volcanic tsunamis, *Philos. Trans. R. Soc. A Math. Phys. Eng. Sci.*, 373,  
548 <https://doi.org/10.1098/rsta.2014.0380>, 2015.
- 549 Paris, R., Switzer, A. D., Belousova, M., Belousov, A., Ontowirjo, B., Whelley, P. L., and Ulvrova, M.:  
550 Volcanic tsunami: A review of source mechanisms, past events and hazards in Southeast Asia (Indonesia,  
551 Philippines, Papua New Guinea), <https://doi.org/10.1007/s11069-013-0822-8>, 7 January 2014.
- 552 Proudman, J.: The Effects on the Sea of Changes in Atmospheric Pressure., *Geophys. J. Int.*, 2, 197–209,  
553 <https://doi.org/10.1111/J.1365-246X.1929.TB05408.X>, 1929.
- 554 Rabinovich, A. B.: Spectral analysis of tsunami waves: Separation of source and topography effects, *J.*  
555 *Geophys. Res. Ocean.*, 102, 12663–12676, <https://doi.org/10.1029/97JC00479>, 1997.
- 556 Ramírez-Herrera, M. T., Coca, O., and Vargas-Espinosa, V.: Tsunami Effects on the Coast of Mexico by  
557 the Hunga Tonga-Hunga Ha’apai Volcano Eruption, Tonga, *Pure Appl. Geophys.*,  
558 <https://doi.org/10.1007/S00024-022-03017-9>, 2022.
- 559 Sakakibara, S., Takeda, S., Iwamoto, Y., and Kubo, M.: A hybrid potential theory for predicting the motions  
560 of a moored ship induced by large-scaled tsunami, *Ocean Eng.*, 37, 1564–1575,  
561 <https://doi.org/10.1016/J.OCEANENG.2010.09.005>, 2010.
- 562 Satake, K., Rabinovich, A. B., Dominey-Howes, D., and Borrero, J. C.: Introduction to “Historical and  
563 Recent Catastrophic Tsunamis in the World: Volume I. The 2011 Tohoku Tsunami,”



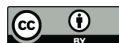

- 564 <https://doi.org/10.1007/s00024-012-0615-0>, 1 June 2013.
- 565 Shampine, L. F.: Some Practical Runge-Kutta Formulas, *Math. Comput.*, 46, 135,  
566 <https://doi.org/10.2307/2008219>, 1986.
- 567 Shevchenko, G., Shishkin, A., Bogdanov, G., and Loskutov, A.: Tsunami Measurements in Bays of  
568 Shikotan Island, *Pure Appl. Geophys.*, 168, 2011–2021, <https://doi.org/10.1007/s00024-011-0284-4>, 2011.
- 569 Shigeki, S. and Masayoshi, K.: Initial attack of large-scaled tsunami on ship motions and mooring loads,  
570 *Ocean Eng.*, 36, 145–157, <https://doi.org/10.1016/j.oceaneng.2008.09.010>, 2009.
- 571 SPDA Actualidad Ambiental: [https://www.actualidadambiental.pe/derrame-petroleo-cronologia-de-lo-](https://www.actualidadambiental.pe/derrame-petroleo-cronologia-de-lo-sucedido-segun-el-capitan-del-buque-mare-doricum-video/)  
572 [sucedido-segun-el-capitan-del-buque-mare-doricum-video/](https://www.actualidadambiental.pe/derrame-petroleo-cronologia-de-lo-sucedido-segun-el-capitan-del-buque-mare-doricum-video/), last access: 1 March 2024.
- 573 Tahar, A. and Kim, M. H.: Hull/mooring/riser coupled dynamic analysis and sensitivity study of a tanker-  
574 based FPSO, <https://doi.org/10.1016/j.apor.2003.02.001>, 2004.
- 575 Terry, J. P., Goff, J., Winspear, N., Bongolan, V. P., and Fisher, S.: Tonga volcanic eruption and tsunami,  
576 January 2022: globally the most significant opportunity to observe an explosive and tsunamigenic  
577 submarine eruption since AD 1883 Krakatau, *Geosci. Lett.*, 9, 24, [https://doi.org/10.1186/s40562-022-](https://doi.org/10.1186/s40562-022-00232-z)  
578 [00232-z](https://doi.org/10.1186/s40562-022-00232-z), 2022.
- 579 Thomson, R. E., Rabinovich, A. B., Fine, I. V., Sinnott, D. C., McCarthy, A., Sutherland, N. A. S., and  
580 Neil, L. K.: Meteorological tsunamis on the coasts of British Columbia and Washington, *Phys. Chem. Earth*,  
581 34, 971–988, <https://doi.org/10.1016/j.pce.2009.10.003>, 2009.
- 582 CNAT: [https://www.tvperu.gob.pe/noticias/nacionales/cnat-no-existe-alerta-de-tsunami-en-el-litoral-](https://www.tvperu.gob.pe/noticias/nacionales/cnat-no-existe-alerta-de-tsunami-en-el-litoral-peruano)  
583 [peruano](https://www.tvperu.gob.pe/noticias/nacionales/cnat-no-existe-alerta-de-tsunami-en-el-litoral-peruano), last access: 6 February 2022.
- 584 World Bank: [https://www.worldbank.org/en/news/press-release/2022/02/14/tonga-volcanic-eruption-and-](https://www.worldbank.org/en/news/press-release/2022/02/14/tonga-volcanic-eruption-and-tsunami-world-bank-disaster-assessment-report-estimates-damages-at-us-90m)  
585 [tsunami-world-bank-disaster-assessment-report-estimates-damages-at-us-90m](https://www.worldbank.org/en/news/press-release/2022/02/14/tonga-volcanic-eruption-and-tsunami-world-bank-disaster-assessment-report-estimates-damages-at-us-90m), last access: 28 February  
586 2024.
- 587 Wilson, R., Lynett, P., Eskijian, M., Miller, K., LaDuke, Y., Curtis, E., Hornick, M., Keen, A., and Ayca,  
588 A.: TSUNAMI HAZARD ANALYSIS AND PRODUCTS FOR HARBORS IN CALIFORNIA, in:  
589 *Tsunami Hazards: Innovations in Mapping, Modeling, and Outreach*, [https://doi.org/10.1130/abs/2017am-](https://doi.org/10.1130/abs/2017am-306344)  
590 [306344](https://doi.org/10.1130/abs/2017am-306344), 2017.
- 591 Wright, C. J., Hindley, N. P., Alexander, M. J., Barlow, M., Hoffmann, L., Mitchell, C. N., Prata, F.,  
592 Bouillon, M., Carstens, J., Clerbaux, C., Osprey, S. M., Powell, N., Randall, C. E., and Yue, J.: Surface-to-  
593 space atmospheric waves from Hunga Tonga–Hunga Ha’apai eruption, *Nature*, 609, 741–746,  
594 <https://doi.org/10.1038/s41586-022-05012-5>, 2022.
- 595 Xu, Z., Sun, L., Rahman, M. N. A., Liang, S., Shi, J., and Li, H.: Insights on the small tsunami from January  
596 28, 2020, Caribbean Sea MW7.7 earthquake by numerical simulation and spectral analysis, *Nat. Hazards*,  
597 111, 2703–2719, <https://doi.org/10.1007/s11069-021-05154-1>, 2022.
- 598 Yokoyama, I.: A geophysical interpretation of the 1883 Krakatau eruption, *J. Volcanol. Geotherm. Res.*, 9,  
599 359–378, [https://doi.org/10.1016/0377-0273\(81\)90044-5](https://doi.org/10.1016/0377-0273(81)90044-5), 1981.
- 600 Zheng, Z., Ma, X., Yan, M., Ma, Y., and Dong, G.: Hydrodynamic response of moored ships to seismic-  
601 induced harbor oscillations, *Coast. Eng.*, 176, 104147, <https://doi.org/10.1016/j.coastaleng.2022.104147>,  
602 2022.
- 603
